# Supplementary material
Source: Springer Nature journal article supplement (https://www.springermedizin.de/resource/supplementary/12885_2006_761_MOESM5_ESM.pdf/9470254)

**A.**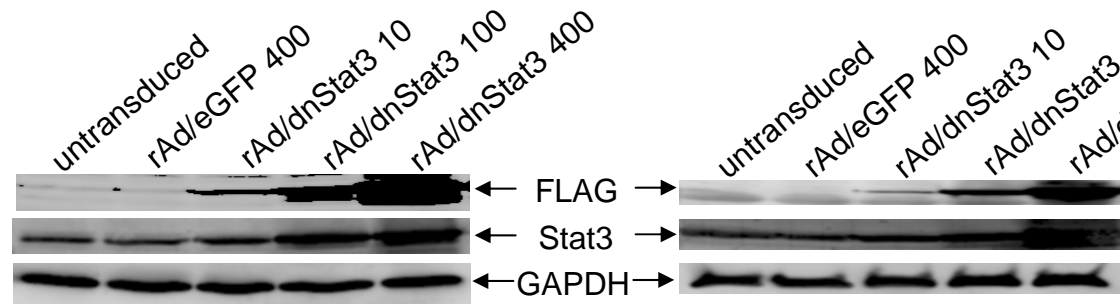**B.**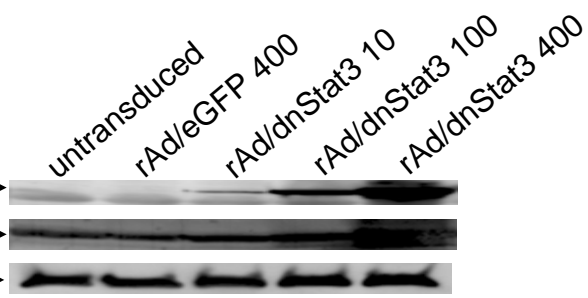**C.**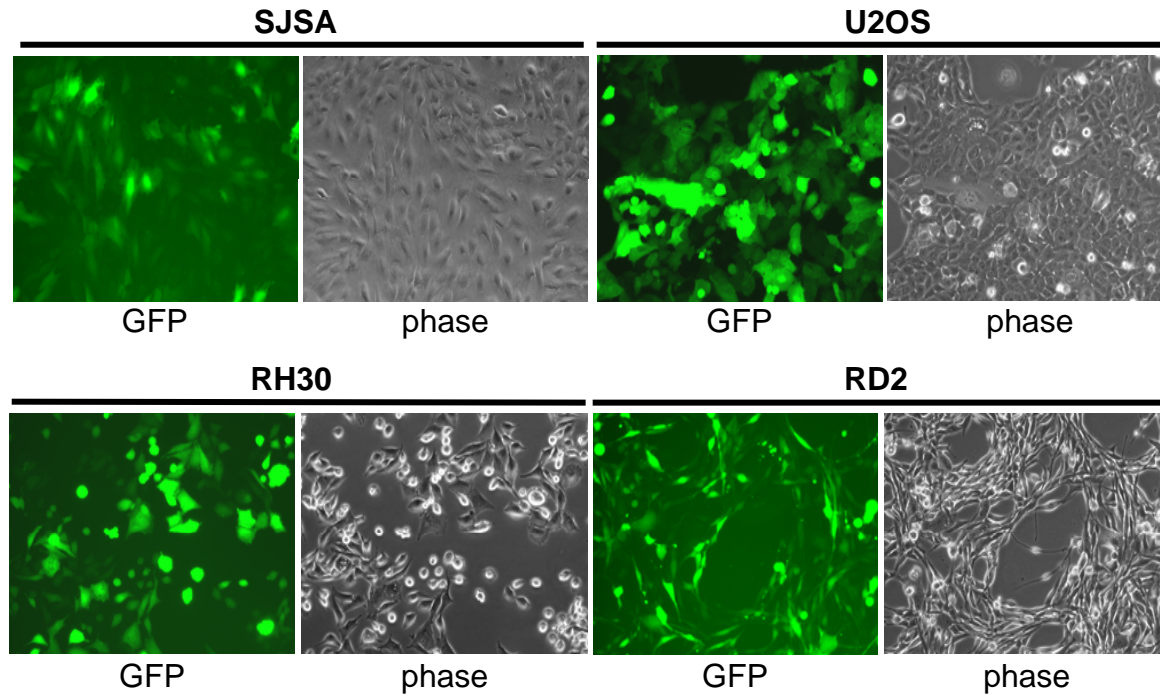

Supplement: MOESM5 [file 9470254]
